# Supplementary material for: Anti-androgenic potential of the fruit extracts of certain Egyptian Sabal species and their genetic variability studies: a metabolomic-molecular modeling approach
Source: Royal Society of Chemistry journal article supplement (doi:10.1039/d1fo03930j), 2022-01-01
Supplement: d1fo03930j1.pdf [file d1fo03930j1.pdf]

---

1 The supplementary material and Supporting information

2 **Anti-androgenic potential of the fruit extracts of certain Egyptian *Sabal* species and their**  
3 **genetic variability studies; A metabolomic-molecular modeling approaches**

4

5 **Supporting information**

6 **Table S1:** Primer Name, sequences, number of total bands, polymorphic bands, percentage of  
7 polymorphism of SCoT primers.

8 **Table S2:** Genetic similarities between the four *Sabal* species based on Jaccard's similarity  
9 coefficient of SCoT data.

10 **Table.S3.** Primer Name, sequences, number of total bands, polymorphic bands, percentage of  
11 polymorphism of CBDP primers.

12 **Table S4:** Genetic similarities between the four *Sabal* species based on Jaccard's similarity  
13 coefficient of CBDP data.

14 **Table S5:** The Reduction% in weights of sex organs of male Sprague Dawley rats after  
15 administration of the fruit methanolic extracts of *S. blackburniana*, *S. causerianum* and *S.*  
16 *palmetto*.

17 **Fig S1.** Total ion chromatogram of *S. blackburniana* fruits (negative ionization mode).

18 **Fig S2.** Total ion chromatogram of *S. yapa* fruits (negative ionization mode).

19 **Fig S3.** Total ion chromatogram of *S. palmetto* fruits (negative ionization mode).

20 **Fig S4.** Total ion chromatogram of *S. causerianum* fruits (positive ionization mode).

21 **Fig.S5.** Putative compounds annotated from the methanolic extract of the selected *Sabal*  
22 species. Orange-colored compounds showed docking scores  $<-7$  kca/mol against 5- $\alpha$ -reductase  
23 2, but got high  $\Delta G$  binding value ( $>-7$ kcal/mol).

24 **Fig.S6.** Putative compounds (1-30) annotated from the methanolic extract of the selected *Sabal*  
25 species. Orange-colored compounds showed docking scores  $<-7$  kca/mol against 5- $\alpha$ -reductase  
26 2, but got high  $\Delta G$  binding value ( $>-7$ kcal/mol). Green-colored compounds got docking score  
27 and  $\Delta G$  binding value  $<-7$  kcal/mol.

28 **Fig.S7.** Putative compounds annotated from the methanolic extract of the selected *Sabal*  
29 species. Orange-colored compounds showed docking scores  $<-7$  kca/mol against 5- $\alpha$ -reductase  
30 2, but got high  $\Delta G$  binding value ( $>-7$ kcal/mol).

31 **Fig.S8.** Putative compounds annotated from the methanolic extract of the selected *Sabal*  
32 species. Orange-colored compounds showed docking scores  $<-7$  kca/mol against 5- $\alpha$ -reductase  
33 2, but got high  $\Delta G$  binding value ( $>-7$ kcal/mol).

---

**Fig.S9.** Putative compounds annotated from the methanolic extract of the selected *Sabal*

species. Orange-colored compounds showed docking scores  $<-7$  kca/mol against 5- $\alpha$ -reductase 2, but got high  $\Delta G$  binding value ( $>-7$ kcal/mol). Green-colored compounds got docking score and  $\Delta G$  binding value  $<-7$  kcal/mol.

**Fig.S10.** Putative compounds annotated from the methanolic extract of the selected *Sabal*

species.

## **Material and Methods (described in detail)**

### ***DNA Fingerprinting***

#### ***SCoT-PCR Amplification***

SCoT PCR amplification was carried out according to the procedure described by (Atia, et al. 2017). A set of 15 SCoT primers were tested against the four Sabal species. PCR was carried out in 25  $\mu$ L reaction mixtures containing 1X PCR buffer, 1.5 mM MgCl<sub>2</sub>, 0.2  $\mu$ M of each dNTPs, 1  $\mu$ M of primer, 1U Go-Taq Flexi polymerase (Promega) and 25 ng genomic DNA.

Thermocycling amplification was performed in a Perkin-Elmer/ Gene Amp PCR system 9700 (PE Applied Biosystem). The amplification was programmed at 94°C for 5 min as an initial denaturation cycle, followed by 35 cycles, each cycle comprised of (94°C for 1min, 50°C for 1min, then 72°C for 90 s) with a final extension at 72°C for 7 min. The amplification products were resolved by electrophoresis in a 1.5% agarose gel containing ethidium bromide (0.5ug/mL) in 1X TBE buffer. A 100 bp plus DNA ladder was used as molecular size standards. PCR products were visualized on UV light and photographed using a Gel Doc™ XR+ System with Image Lab™ Software (Bio-Rad®).

#### ***CBDP-PCR Amplification***

Sixteen CBDP primers (Table S2), used in the current study, were designed according to Singh et al., (2014). PCR was performed in 25  $\mu$ L reaction total volume containing 1X PCR buffer, 1.5 mM MgCl<sub>2</sub>, 0.2  $\mu$ M of each dNTPs, 1  $\mu$ M of primer, 1U Go-Taq Flexi polymerase (Promega) and 40 ng genomic DNA. Thermocycling amplification was performed in a Gene Amp 9700 PCR system (Applied Biosystem, USA). The PCR amplification was programmed as follows: 94°C for 5 min as an initial denaturation cycle, followed by 35 cycles, each cycle comprised of (94°C for 1min, 50°C for 1min, then 72°C for 90 s) with a final extension at 72°C for 7 min. The PCR products were resolved on 1.5% agarose gel containing ethidium bromide (0.5ug/mL) in 1X TBE buffer. A 100 bp plus and 1Kb DNA ladder were used as molecular size

---

standards. Finally, PCR products were visualized on UV light and photographed using a Gel Doc™ XR+ System with Image Lab™ Software (Bio-Rad®).

### ***Data Analysis***

For SCoT and CBDP data analysis, the amplified bands were scored manually. The bands were scored as absent (0) or present (1) to create the binary data matrix. A similarity matrix was constructed according to the Jaccard similarity coefficient (Atia et al., 2021). For SCoT, and CBDP marker systems data, dendrograms were developed using cluster analysis and the unweighted pair group method of arithmetic averages (UPGMA).

### ***Experimental Design***

#### ***Castration of Male Rats (Orchiectomy).***

On the experiment day, rats were anaesthetized with an intraperitoneal injection of ketamine (50 mg/kg) and xylazine (8 mg/kg). Castration of the rats was carried out according to a previously described method (Sandow 2016 Massey et al. 2011; Gray et al. 2005). Briefly, the skin was disinfected with surgical povidone iodine (10%) before a midline incision of 1 cm was made through the skin and the underlying skeletal muscle layer to expose the testes. Prior to bilateral orchiectomy, the vas deferens, testicular artery and veins were ligated by a 4-0 bioabsorbable surgical suture. Finally, the midline incision was sutured using a 3-0 silk surgical suture. Then all animals were given amoxicillin (50 mg/k, i.m.) as prophylaxis against postoperative infections. Sham-operated rats have experienced the same surgical procedure except for the step of orchidectomy and ligation. The experimental work carried out in this study was approved by the Commission on Ethics of Scientific Research, Faculty of Pharmacy, Minia University (Project: ES03/2020)

### ***Cell culture***

Human Benign Prostatic Hyperplasia (BPH-1) and human prostatic stromal myofibroblast (WPMY-1) Cell Lines were added for 4–6 h in the incubator maintained at 5% CO<sub>2</sub> at 37°C. Detached cells were collected and centrifuged at 1000 RPM for 3 min and transferred to a culture flask and incubated at 37 °C, 5% CO<sub>2</sub> in air atmosphere for 24 h. When up to 80% to 90% confluence, the cells were harvested by using 0.25% Trypsin-EDTA (Gibco, Invitrogen). Then, cells were replanted into 10 cm culture plates at the appropriate density and cell morphology and adherence were evaluated. cells were cultured using DMEM (Invitrogen/Life Technologies) supplemented with 10% FBS (Hyclone,), to make the complete growth medium,

---

97 10 µg/ml of insulin (Sigma), and 1% penicillin-streptomycin. All of the other chemicals and  
98 reagents were from Sigma, or Invitrogen. Plate cells (cells density  $1.2 - 1.8 \times 10,000$   
99 cells/well) in a volume of 100 µl complete growth medium + 100 µl of the tested extract per  
100 well in a 96-well plate for 24 hours before the MTT assay. All operations should be carried out  
101 under strict aseptic conditions. Remove culture medium to a centrifuge tube. Briefly rinse the  
102 cell layer with 0.25% (w/v) Trypsin 0.53 mM EDTA solution to remove all traces of serum  
103 which contains Trypsin inhibitor. Add 2.0 to 3.0 ml of Trypsin EDTA solution to flask and  
104 observe cells under an inverted microscope until cell layer is dispersed (within 5 to 15  
105 minutes). Note: To avoid clumping do not agitate the cells by hitting or shaking the flask while  
106 waiting for the cells to detach. Cells that are difficult to detach may be placed at 37°C to  
107 facilitate dispersal. Add 6.0 to 8.0 mL of complete growth medium and aspirate cells by gently  
108 pipetting. Transfer the cell suspension to the centrifuge tube with the medium and cells and  
109 centrifuge at approximately 125 xg for 5 to 10 minutes. Discard the supernatant. Resuspend the  
110 cell pellet in fresh growth medium. Add appropriate aliquots of the cell suspension to new  
111 culture vessels. Incubate cultures at 37°C for 24 hrs. 8-After treatment of cells with the serial  
112 concentrations of the selected extracts (63, 125, 250, 500 and 1000 µg/ml) to be tested  
113 incubation is carried out for 48 h at 37°C, then the plates are to be examined under the inverted  
114 microscope and proceed for the MTT assay.

#### 115 ***MTT – Cytotoxicity assay***

116 Remove cultures from incubator into laminar flow hood or other sterile work area.  
117 Reconstitute each vial of MTT [M-5655] to be used with 3 ml of medium or balanced salt  
118 solution without phenol red and serum. Add reconstituted MTT in an amount equal to 10% of  
119 the culture medium volume. Return cultures to incubator for 2-4 hours depending on cell type  
120 and maximum cell density. (An incubation period of 2 hours is generally adequate but may be  
121 lengthened for low cell densities or cells with lower metabolic activity.) Incubation times  
122 should be consistent when making comparisons. After the incubation period, remove cultures  
123 from incubator and dissolve the resulting formazan crystals by adding an amount of MTT  
124 Solubilization Solution [M-8910] equal to the original culture medium volume. Gentle mixing  
125 in a gyratory shaker will enhance dissolution. Occasionally, especially in dense cultures,  
126 trituration may be required to completely dissolve the MTT formazan crystals.  
127 Spectrophotometrically measure absorbance at a wavelength of 570 nm. Measure the  
128 background absorbance of multi-well plates at 690 nm and subtract from the 450 nm  
129 measurement. Tests performed in multi-well plates can be read using the appropriate type of

---

130 plate reader or the contents of individual wells may be transferred to appropriate size cuvettes  
131 for spectrophotometric measurement.

### 132 ***LC-HRMS metabolomic analysis***

133 Metabolomic profiling of the methanolic fruits extracts of *S. blackburniana*, *S.*  
134 *causiarum*, *S. palmetto* and *S. yapa* was performed using an Acquity Ultra Performance Liquid  
135 Chromatography system coupled to a Synapt G2 HDMS quadrupole time-of-flight hybrid mass  
136 spectrometer (Waters, Milford, USA). The HPLC column, a BEH C18 column (2.1 × 100 mm,  
137 1.7 µm particle size; Waters, Milford, CT, USA) with a guard column (2.1 × 5 mm, 1.7 µm  
138 particle size) and a linear solvent gradient of 0–100% eluent B at a flow rate of 300 µL/min  
139 over 5 min, using 0.1% formic acid in water (v/v) as solvent A and acetonitrile as solvent B  
140 was used for chromatographic separation. The column temperature was 40°C and the injection  
141 volume was 2 µL. The total analysis time for each sample was 45 min. The dereplication of  
142 each m/z ion peak was achieved, metabolites recorded in the customized databases based on  
143 established parameters (m/z threshold of ± 3 ppm and retention time). Conversion of the raw  
144 data into sliced positive and negative ionization files was performed via MS-convert software.  
145 Negative and positive ionization switch modes were used to include the highest number of  
146 metabolites from the investigated plant extracts. The obtained files were subjected to the data  
147 mining MZmine 2.10 software (Okinawa Institute of Science and Technology Graduate  
148 University, Japan) for deconvolution, peak picking, alignment, deisotoping, and formula  
149 prediction.

### 150 ***In silico study***

#### 151 ***Molecular Docking***

152 AutoDock Vina software was used in all molecular docking experiments (Gong, et  
153 al.,2006). 11 annotated compounds were docked against the human 5- $\alpha$ -reductase 2 crystal  
154 structure (PDB codes: 7BW1) (Seeliger, D and de Groot, B.L. ,2010). The binding site was  
155 determined according to the enzyme's co-crystallized ligand. The active site of the enzyme is  
156 relatively flexible and, to account for this flexibility, we used MDS-derived conformers  
157 sampled every 25 ns for docking experiments (i.e., ensemble docking) (Jin, et al.,2020; Sayed,  
158 et al.,2020) Subsequently, we ranked the resulting top hits according to their calculated binding  
159 energies. Docking poses were analyzed and visualized using Pymol software (Gong, et  
160 al.,2006).

#### 161 ***Binding Free Energy Calculations***

162 Binding free energy calculations ( $\Delta G$ ) were performed using the free energy perturbation  
163 (FEP) method (Kim, et al., 2020). This method was described in detail in the recent article by  
164 Kim and coworkers (Amaro et al., 2018). Briefly, it calculates the binding free energy  
165  $\Delta G_{\text{binding}}$  according to the following equation:  $\Delta G_{\text{binding}} = \Delta G_{\text{Complex}} - \Delta G_{\text{Ligand}}$ . The  
166 value of each  $\Delta G$  is estimated from a separate simulation using NAMD software. Interestingly,  
167 all input files required for simulation by NAMD (Bowers, et al., 2006; Kim, et al., 2020), can be  
168 papered by using the online website Charmm-GUI ([https://charmm-](https://charmm-gui.org/?doc=input/afes.abinding)  
169 [gui.org/?doc=input/afes.abinding](https://charmm-gui.org/?doc=input/afes.abinding), accessed on 18 May 2021). Subsequently, we can use these  
170 files in NAMD to produce the required simulations using the FEP calculation function in  
171 NAMD. The equilibration was achieved in the NPT ensemble at 300 K and 1 atm (1.01325 bar)  
172 with Langevin piston pressure (for "Complex" and "Ligand") in the presence of the TIP3P  
173 water model. Then, 10 ns FEP simulations were performed for each compound, and the last 5  
174 ns of the free energy values was measured for the final free energy values (Amaro et al., 2018).  
175 Finally, the generated trajectories were visualized and analyzed using VMD software.

176 Table S1: Primer Name, sequences, number of total bands, polymorphic bands, percentage of polymorphism  
177 of SCoT primers.

| Primer<br>Name | Sequence           | Number of Bands |             | % of polymorphism |
|----------------|--------------------|-----------------|-------------|-------------------|
|                |                    | Total           | Polymorphic |                   |
| SCoT-1         | CAACAATGGCTACCACCA | 8               | 5           | 62.5              |
| SCoT-3         | CAACAATGGCTACCACCG | 10              | 8           | 80.0              |
| SCoT-4         | CAACAATGGCTACCACCT | 12              | 9           | 75.0              |
| SCoT-5         | CAACAATGGCTACCACGA | 13              | 7           | 53.8              |
| SCoT-6         | CAACAATGGCTACCACGC | 12              | 9           | 75.0              |
| SCoT-8         | CAACAATGGCTACCACGT | 14              | 11          | 78.6              |
| SCoT-9         | CAACAATGGCTACCAGCA | 12              | 10          | 83.3              |
| SCoT-10        | CAACAATGGCTACCAGCC | 8               | 6           | 75.0              |
| SCoT-11        | AAGCAATGGCTACCACCA | 11              | 7           | 63.6              |
| SCoT-12        | ACGACATGGCGACCAACG | 13              | 8           | 61.5              |
| SCoT-13        | ACGACATGGCGACCATCG | 14              | 10          | 71.4              |
| SCoT-14        | ACGACATGGCGACCACGC | 10              | 6           | 60.0              |
| SCoT-15        | ACGACATGGCGACCGCGA | 9               | 5           | 55.6              |
| SCoT-24        | CACCATGGCTACCACCAT | 11              | 7           | 63.6              |
| SCoT-25        | ACCATGGCTACCACCGGG | 9               | 6           | 66.7              |
| Total          |                    | 166             | 114         | 68.7              |
| Average        |                    | 11.07           | 7.6         |                   |

179 **Table S2:** Genetic similarities between the four *Sabal* species based on Jaccard's similarity  
180 coefficient of SCoT data.

|                         | <i>S. causiurum</i> | <i>S. blackburniana</i> | <i>S. palmetto</i> | <i>S. yapa</i> |
|-------------------------|---------------------|-------------------------|--------------------|----------------|
| <i>S. causiurum</i>     | 100%                | --                      | --                 | --             |
| <i>S. blackburniana</i> | 88%                 | 100%                    | --                 | --             |
| <i>S. palmetto</i>      | 82%                 | 80%                     | 100%               | --             |
| <i>S. yapa</i>          | 79%                 | 76%                     | 78%                | 100%           |

181

182 Table S3: Primer Name, sequences, number of total bands, polymorphic bands, percentage of polymorphism  
183 of CBDP primers.

| Primer Code | Primer Sequence    | Number of Bands |             | % of polymorphism |
|-------------|--------------------|-----------------|-------------|-------------------|
|             |                    | Total           | Polymorphic |                   |
| CAAT-2      | TGAGCACGATCCAATAAT | 9               | 6           | 66.7              |
| CAAT-3      | TGAGCACGATCCAATACC | 11              | 8           | 72.7              |
| CAAT-4      | TGAGCACGATCCAATAAG | 13              | 8           | 61.5              |
| CAAT-5      | TGAGCACGATCCAATCTA | 14              | 10          | 71.4              |
| CAAT-6      | TGAGCACGATCCAATCAG | 13              | 8           | 61.5              |
| CAAT-7      | TGAGCACGATCCAATCGA | 15              | 11          | 73.3              |
| CAAT-8      | TGAGCACGATCCAATCGG | 16              | 10          | 62.5              |
| CAAT-9      | TGAGCACGATCCAATGAT | 11              | 7           | 63.6              |
| CAAT-10     | TGAGCACGATCCAATGTT | 11              | 8           | 72.7              |
| CAAT-11     | TGAGCACGATCCAATTGC | 12              | 10          | 83.3              |
| CAAT-12     | TGAGCACGATCCAATATA | 13              | 7           | 53.8              |
| CAAT-14     | TGAGCACGATCCAATGCG | 7               | 3           | 42.9              |
| CAAT-15     | TGAGCACGATCCAATTGA | 9               | 4           | 44.4              |
| CAAT-16     | TGAGCACGATCCAATTCA | 12              | 6           | 50.0              |
| CAAT-17     | TGAGCACGATCCAATTTG | 11              | 7           | 63.6              |
| CAAT-19     | CTGAGCACGATCCAATAC | 10              | 6           | 60.0              |
| Total       |                    | 187             | 119         | 63.6              |
| Average     |                    | 11.69           |             | 7.44              |

184 **Table S4:** Genetic similarities between the four *Sabal* species based on Jaccard's similarity coefficient  
185 of CBDP data.

|                         | <i>S. causiurum</i> | <i>S. blackburniana</i> | <i>S. palmetto</i> | <i>S. yapa</i> |
|-------------------------|---------------------|-------------------------|--------------------|----------------|
| <i>S. causiurum</i>     | 100%                | --                      | --                 | --             |
| <i>S. blackburniana</i> | 87%                 | 100%                    | --                 | --             |
| <i>S. palmetto</i>      | 83%                 | 81%                     | 100%               | --             |
| <i>S. yapa</i>          | 84%                 | 79%                     | 85%                | 100%           |

186

187 Table.S5. The Reduction% in weights of sex organs of male *Sprague Dawley* rats after administration of the  
188 fruit methanolic extracts of *S. Blackburniana*, *S. caudatum* and *S. palmetto*.

| Tested groups               | Reduction% in weights of sex organs |               |                        |              |                    |               |
|-----------------------------|-------------------------------------|---------------|------------------------|--------------|--------------------|---------------|
|                             | Prostate weight                     | P W/B W index | Seminal Vesicle weight | SV/B W index | Levator ani weight | L A/B W index |
| T + <i>S. Blackburniana</i> | 54.10%*                             | 51.50%*       | 37.75%*                | 33.64%*      | 44.33%*            | 40.06%*       |
| T + <i>S. caudatum</i>      | 52.30% *                            | 55.20%*       | 32.93%*                | 35.93%*      | 21.58%**           | 26.43%**      |
| T + <i>S. palmetto</i>      | 34.85%*                             | 35.39%*       | 9.57%                  | 8%           | 23.05%**           | 24.62%**      |

189 Significant from Testosterone group (T) at  $p < 0.05$  \*\*Significant from Testosterone group (T) at  $p < 0.01$ . Data was  
190 analysed using one-way ANOVA followed by Tukey's post-comparison test.

191 .

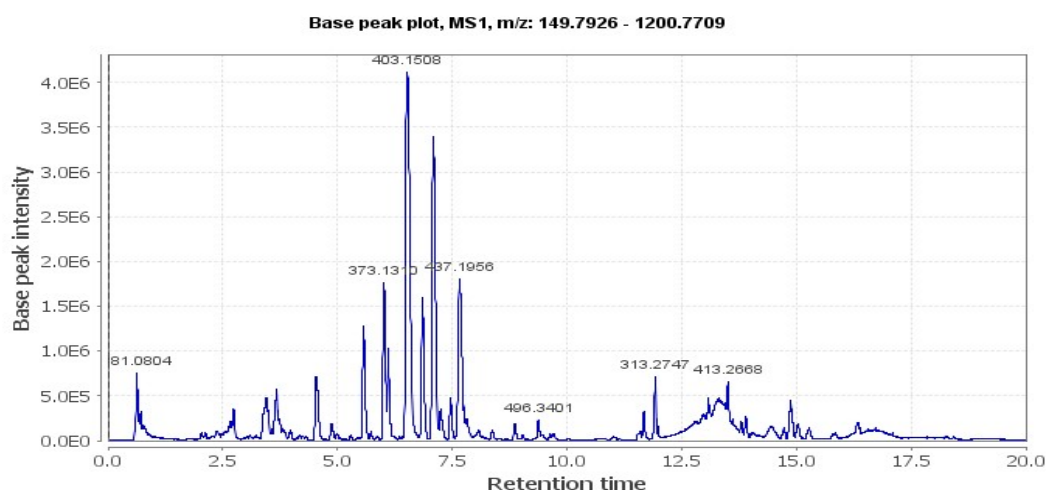

192

193 **Fig (S1):** Total ion chromatogram of *S. Blackburniana* fruits (negative ionization mode).

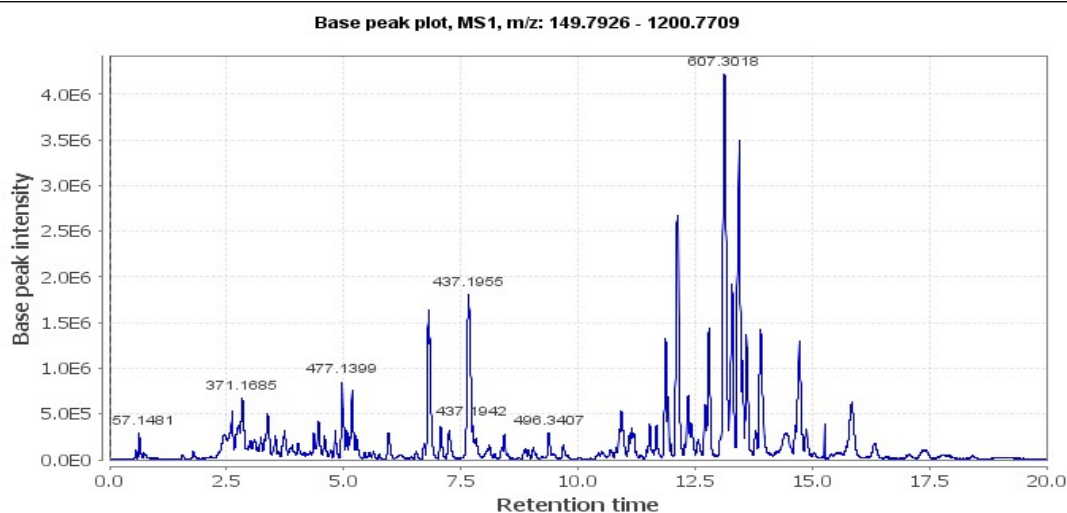

**Fig (S2):** Total ion chromatogram of *S. yapa* fruits (negative ionization mode).

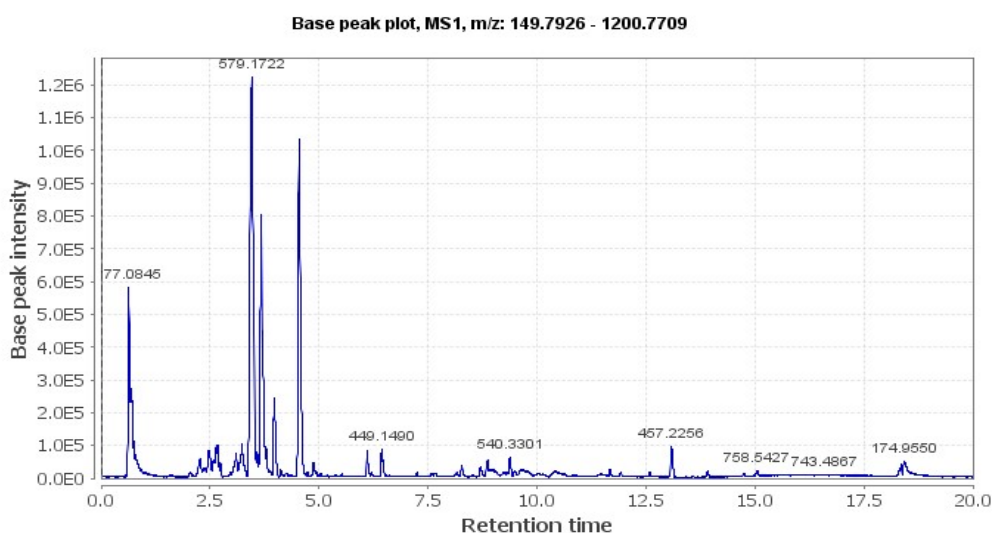

**Fig (S3):** Total ion chromatogram of *S. palmetto* fruits (negative ionization mode).

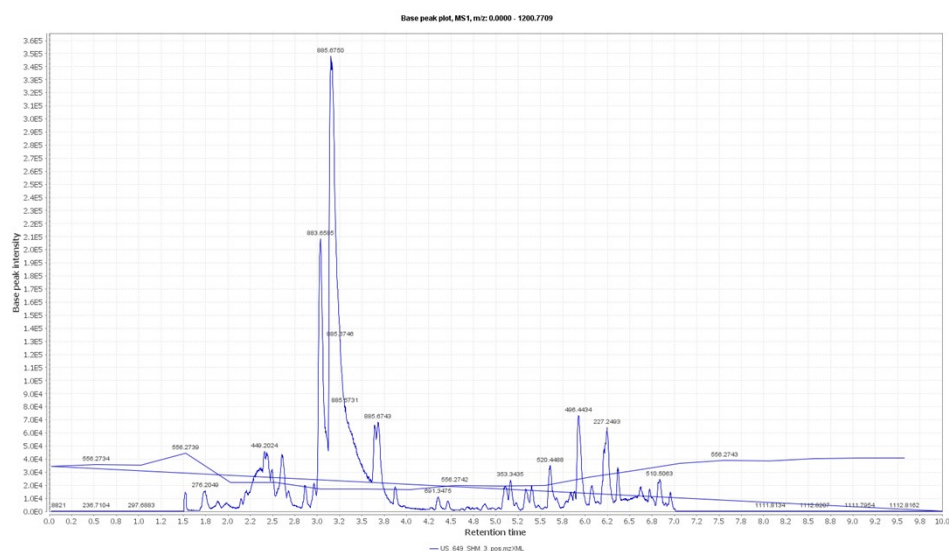

**Fig (S4):** Total ion chromatogram of *S. causiurum* fruits (positive ionization mode)

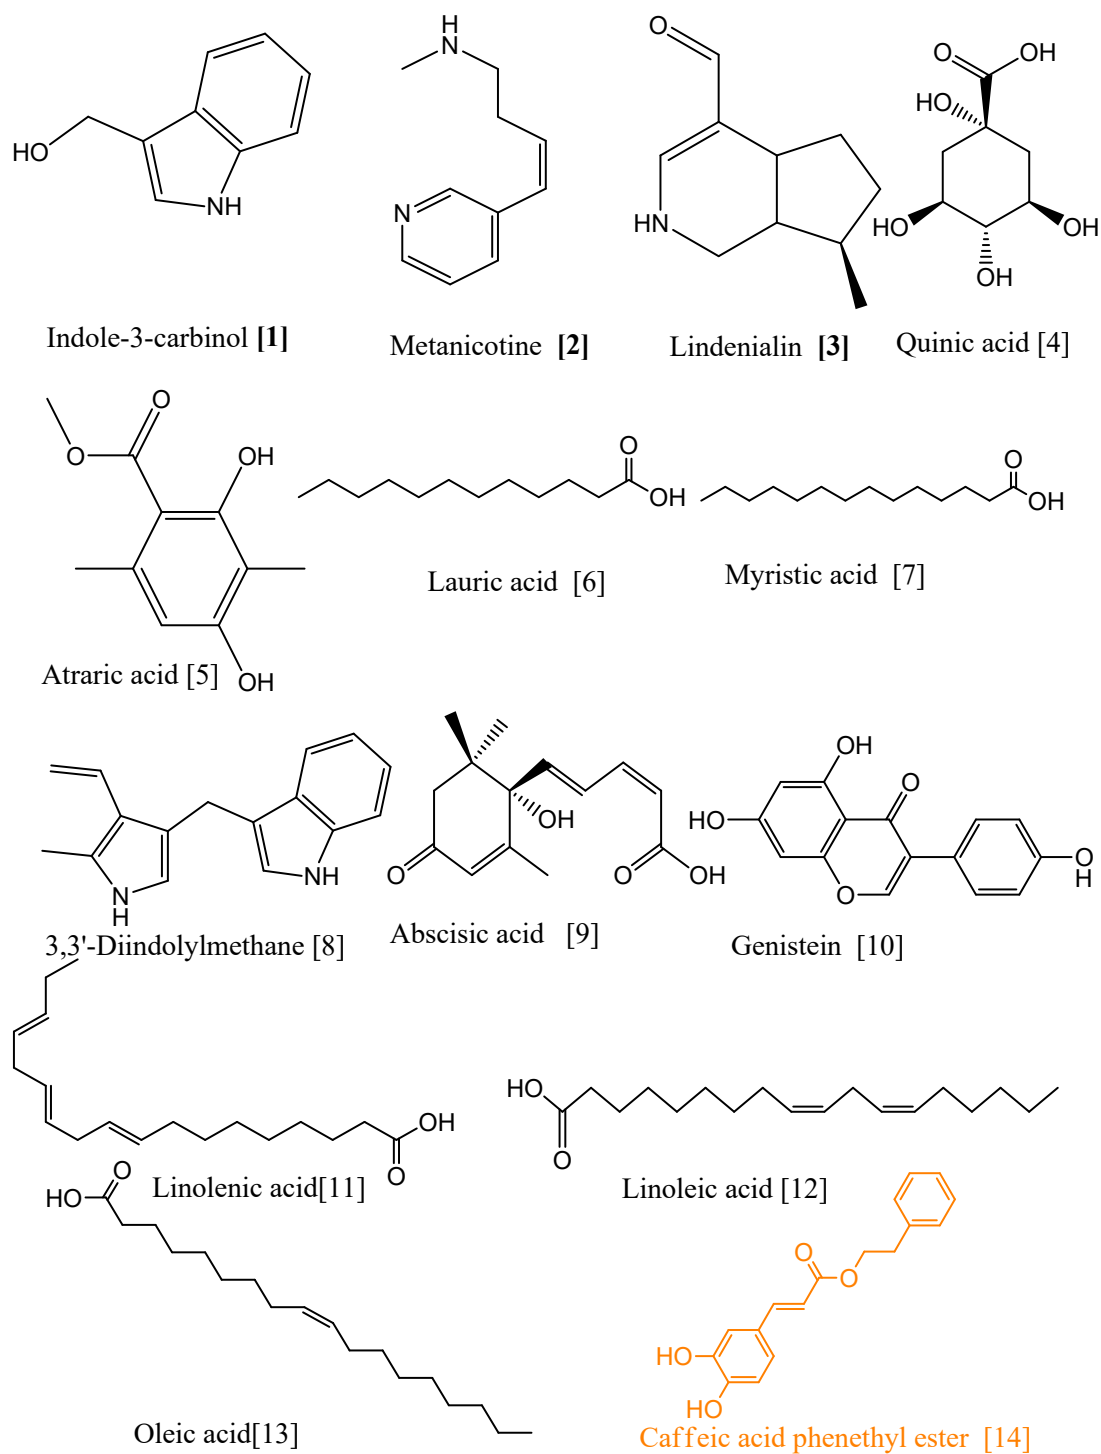

201

202

203 **Fig.S5.** Putative compounds annotated from the methanolic extract of the selected *Sabal* species.204 Orange-colored compounds showed docking scores <-7 kca/mol against 5- $\alpha$ -reductase 2, but got high205  $\Delta G_{\text{binding}}$  value (>-7kcal/mol).

206

207

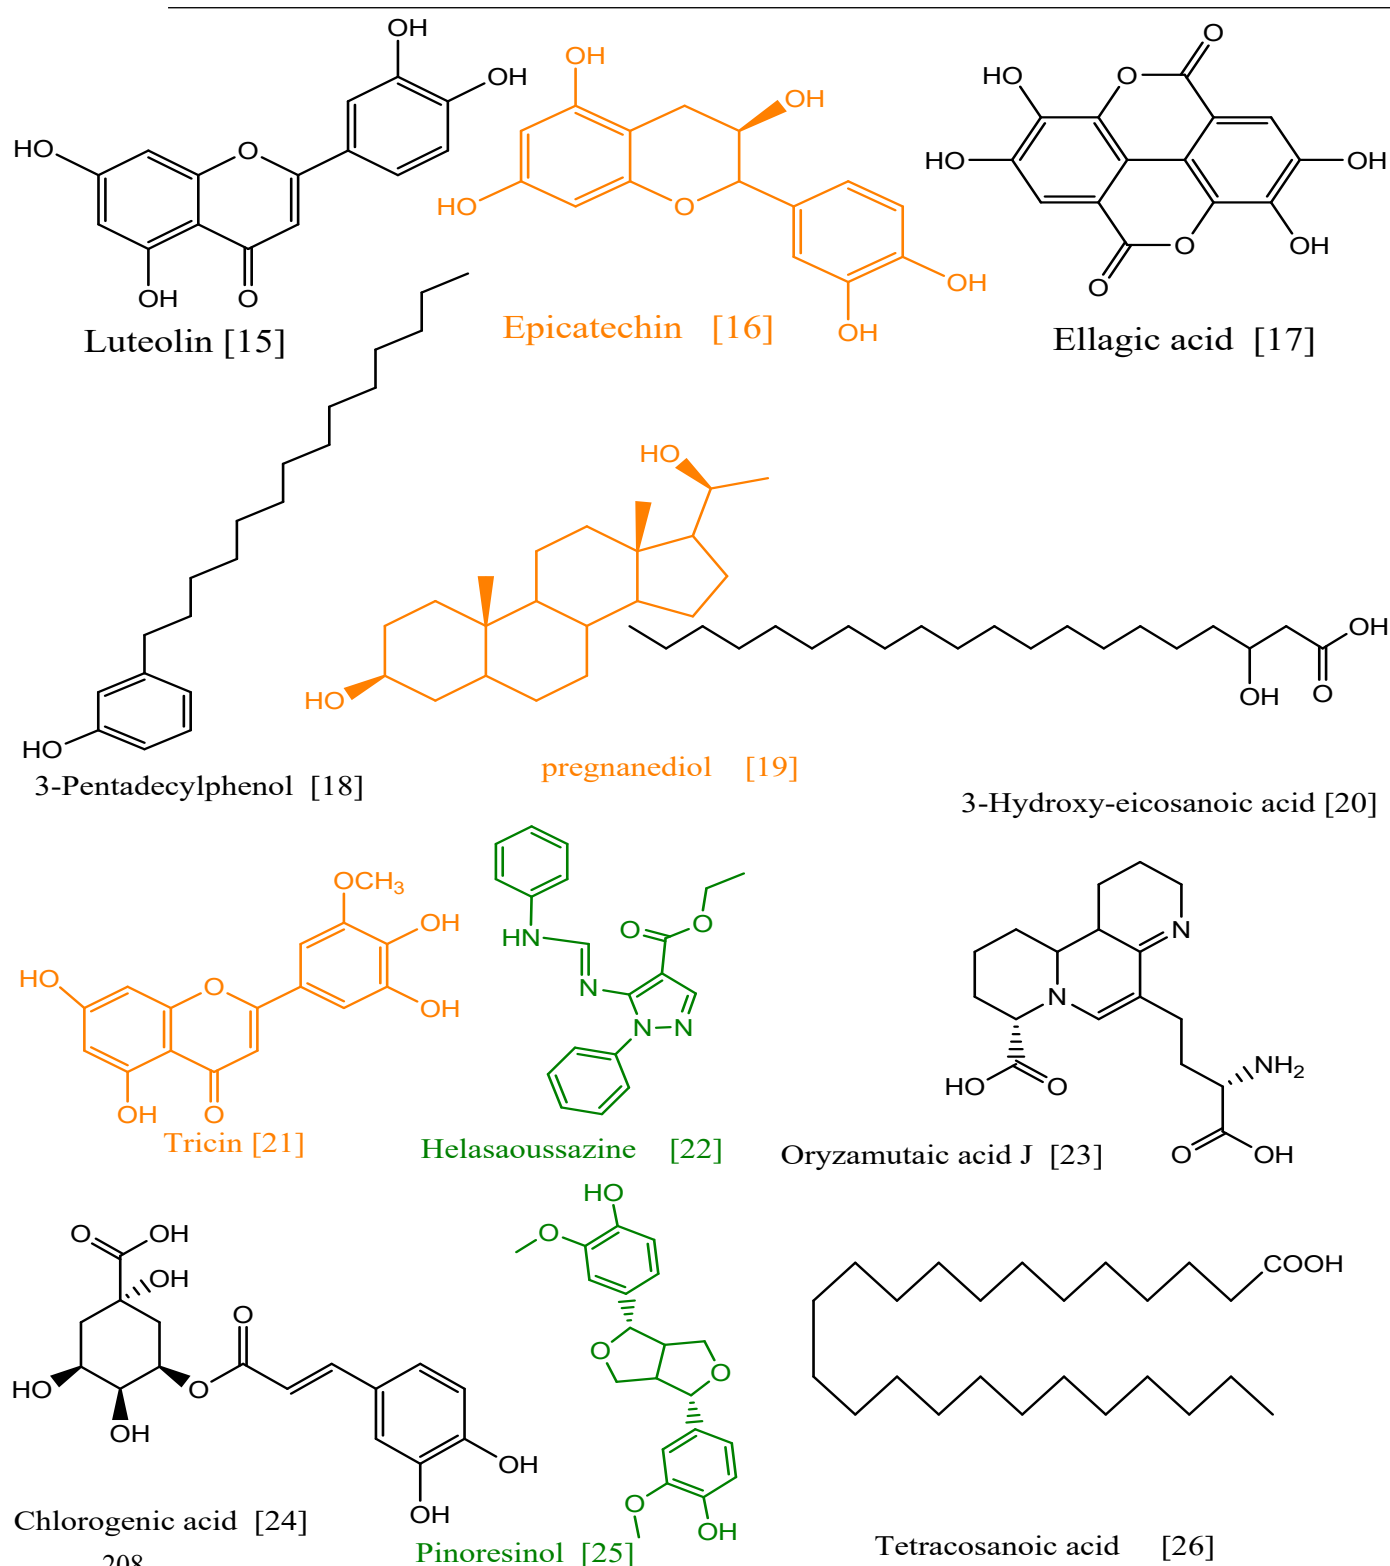

**Fig.S6.** Putative compounds annotated from the methanolic extract of the selected *Sabal* species.  
 Orange-colored compounds showed docking scores  $<-7$  kcal/mol against 5- $\alpha$ -reductase 2, but got high  $\Delta G_{\text{binding}}$  value ( $>-7$  kcal/mol). Green-colored compounds got docking score and  $\Delta G_{\text{binding}}$  value  $<-7$  kcal/mol.

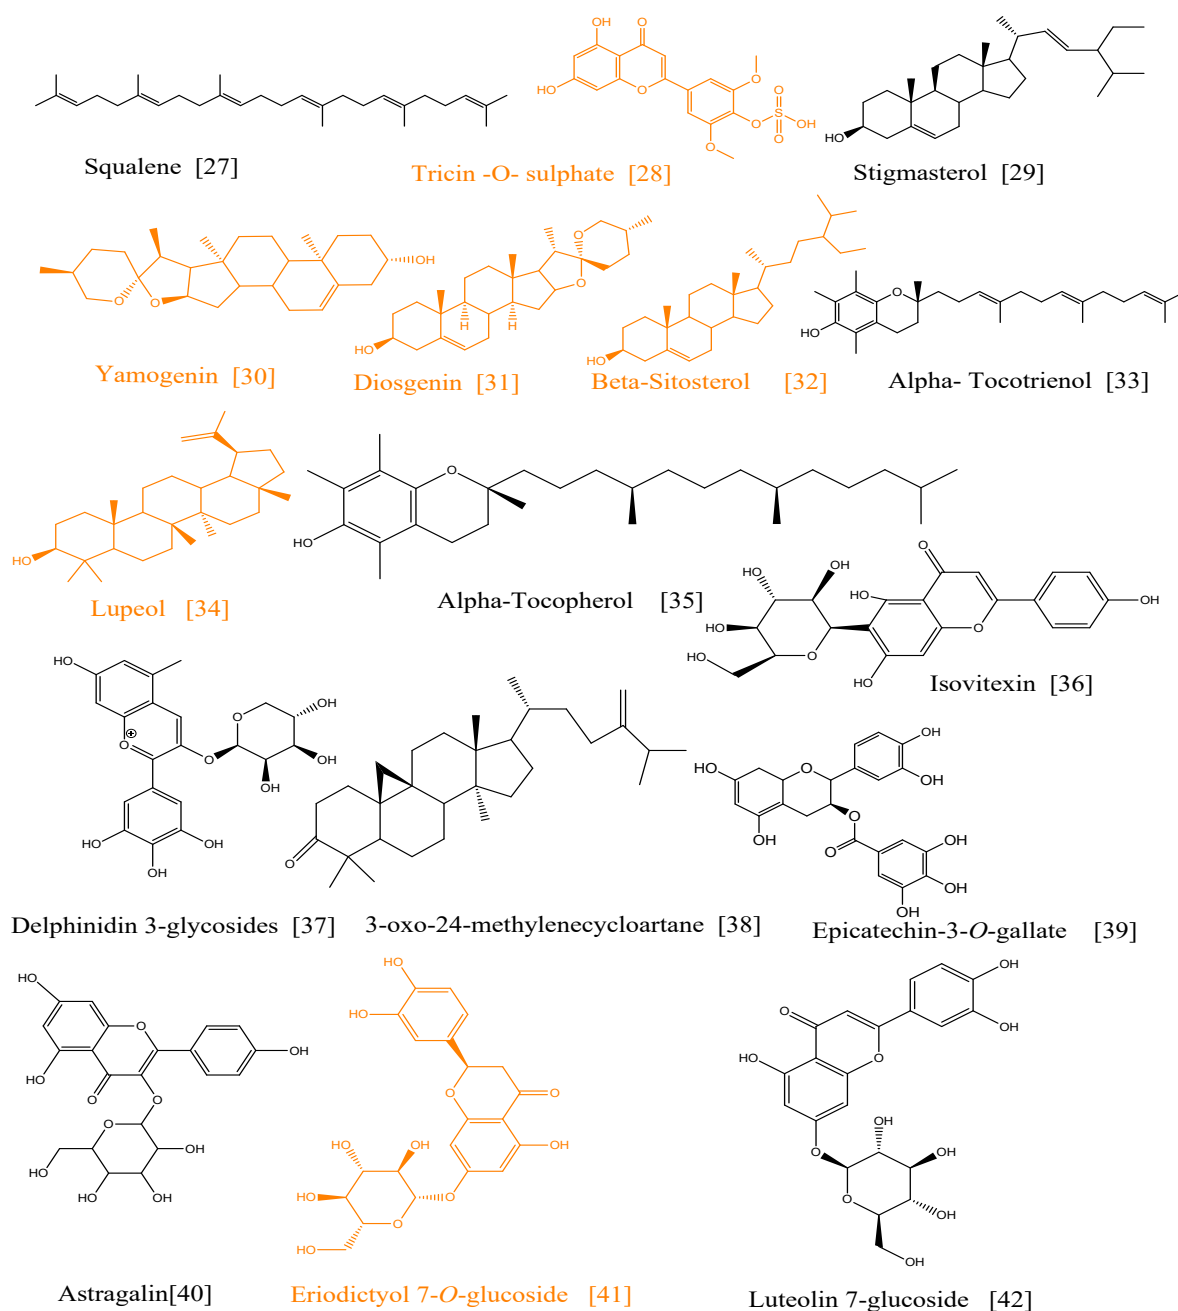

216

217

218 **Fig.S7.** Putative compounds annotated from the methanolic extract of the selected *Sabal* species.219 Orange-colored compounds showed docking scores <-7 kcal/mol against 5- $\alpha$ -reductase 2, but got high  
220  $\Delta G_{\text{binding}}$  value (>-7kcal/mol).

221

222

223

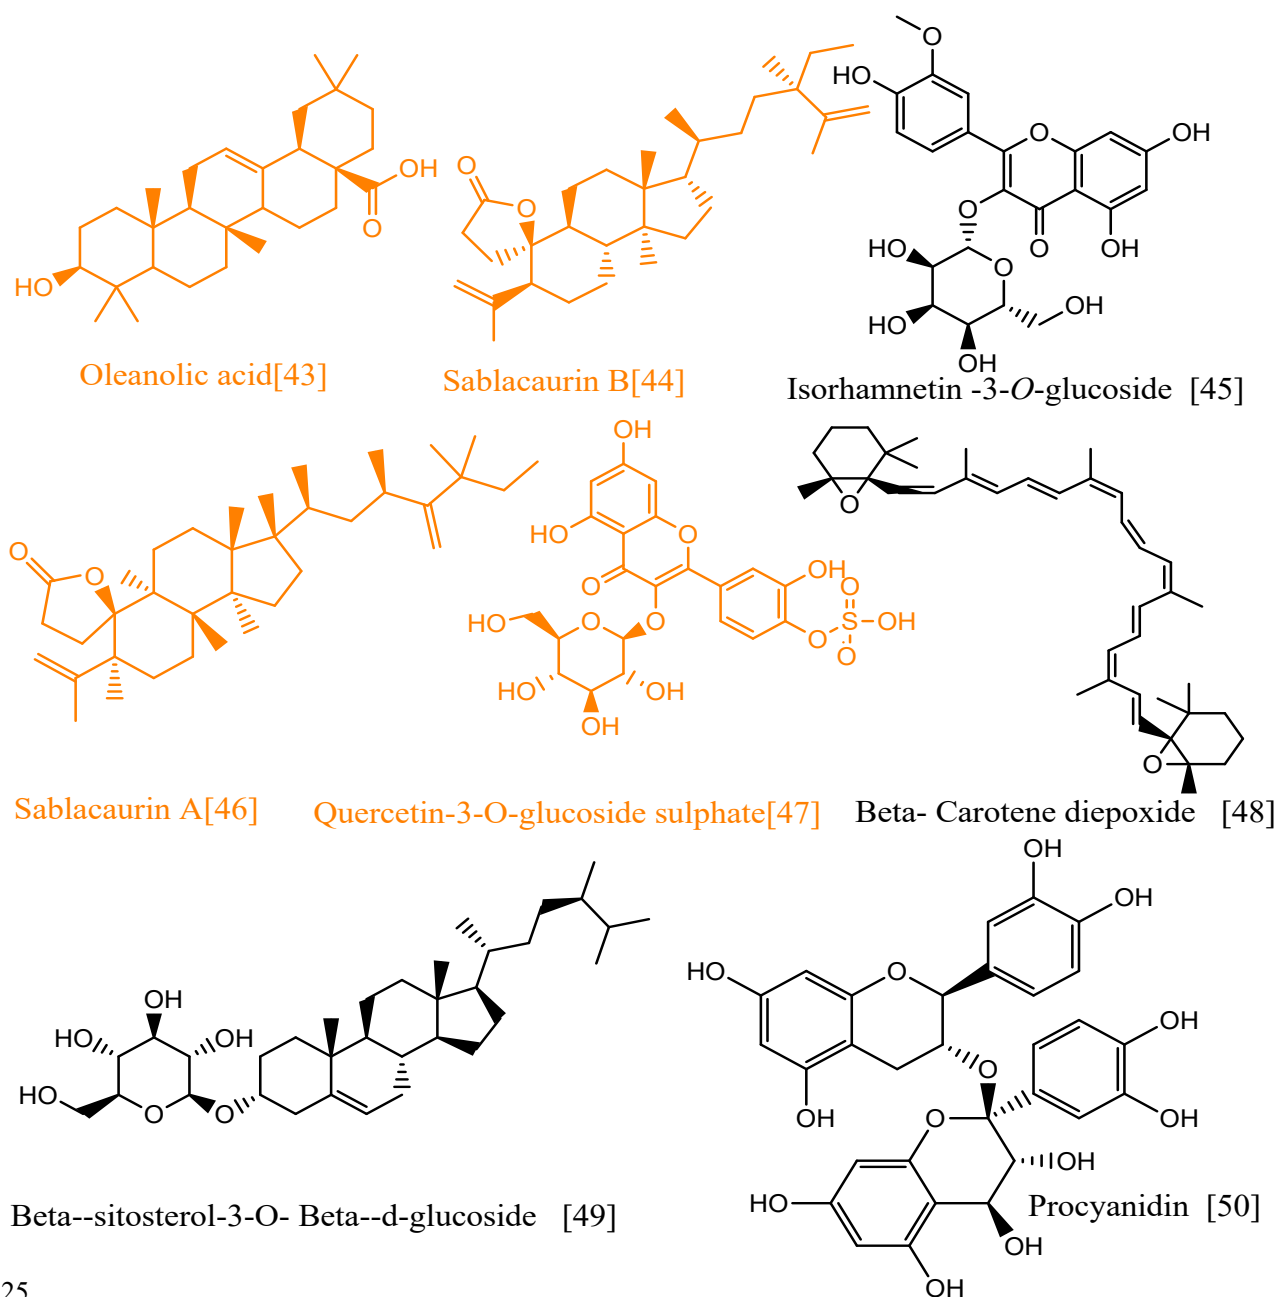

225  
226

227 **Fig.S8.** Putative compounds annotated from the methanolic extract of the selected *Sabal* species.  
 228 Orange-colored compounds showed docking scores  $<-7$  kcal/mol against 5- $\alpha$ -reductase 2, but got high  
 229  $\Delta G_{\text{binding}}$  value ( $>-7$  kcal/mol).

230

231

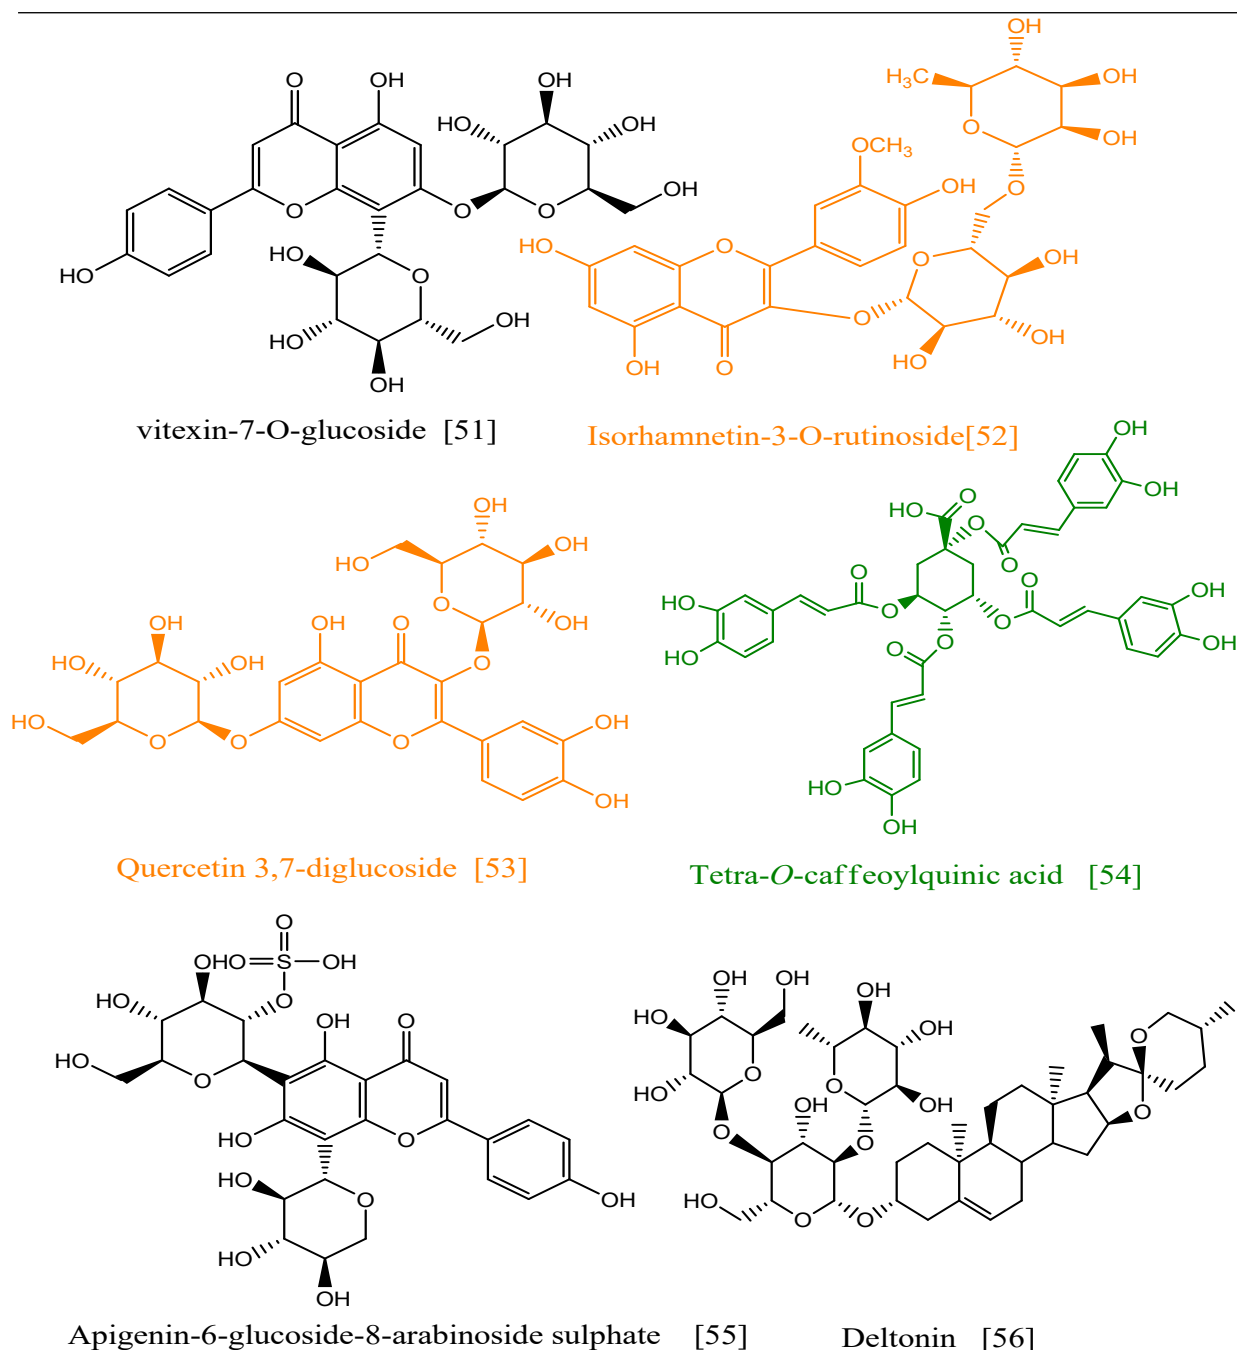

232  
233

234 **Fig.S9.** Putative compounds annotated from the methanolic extract of the selected *Sabal*  
 235 species. Orange-colored compounds showed docking scores <-7 kca/mol against 5- $\alpha$ -reductase  
 236 2, but got high  $\Delta G_{\text{binding}}$  value (>-7kcal/mol). Green-colored compounds got docking score and  
 237  $\Delta G_{\text{binding}}$  value <-7 kcal/mol.

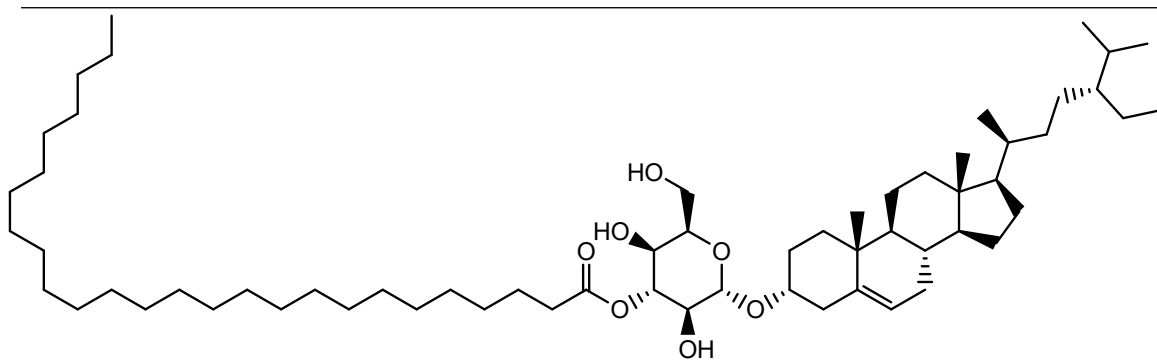

Beta-sitosterol glucoside-3'-O-hexacosanoate [58]

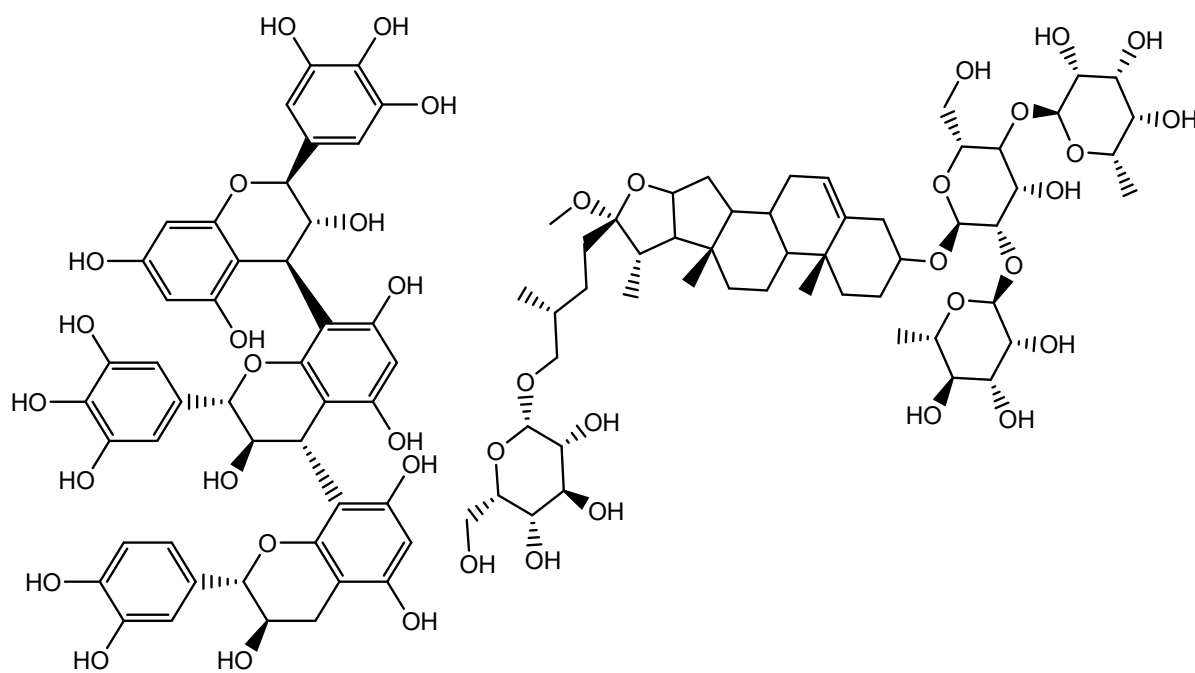

Gallocatechin-(4 $\alpha$ -8)]2-catechin [57]

Methylprotodioscin [59]

238  
239

240 **Fig.S10.** Putative compounds annotated from the methanolic extract of the selected *Sabal*  
241 species.

242

243

244

245

246

247

248

---

## 249 References

- 250 Atia, M.A., Sakr, M.M. and Adawy, S.S., 2017. Assessing date palm genetic diversity using  
251 different molecular markers. In *Date Palm Biotechnology Protocols Volume II* (pp. 125-  
252 142). Humana Press, New York, NY.
- 253 Singh AK, Rana MK, Singh S, Kumar S, Kumar R, Singh R. CAAT box-derived polymorphism  
254 (CBDP): a novel promoter-targeted molecular marker for plants. *Journal of Plant*  
255 *Biochemistry and Biotechnology*. 2014 Apr 1;23(2):175-83.
- 256 Atia M, Abd El-Moneim D., Abdelmoneim T.K., Reda E.H., Abdel Shakour Z. T., El-Halawany  
257 A.M, El-Kashoury E. A., Shams K.A., Abdel-Azim N. S & Hegazy M., 2021. Evaluation of  
258 genetic variability and relatedness among eight *Centaurea* species through CAAT-box  
259 derived polymorphism (CBDP) and start codon targeted polymorphism (SCoT) markers,  
260 *Biotechnology & Biotechnological Equipment*, 35:1, 1230-1237.
- 261 Gray, L.E Jr., Furr, J and Ostby, J.S., 2005. Hershberger assay to investigate the effects of  
262 endocrine disrupting compounds with androgenic and antiandrogenic activity in castrate-  
263 immature male rats. In: *Current Protocols in Toxicology* 16.9.1-16.9.15.
- 264 Massey C, Dhuyvetter KC, Llewelyn et al. ,2011. Castration and morbidity and their effects on  
265 performance, carcass quality, and price differentials for bulls and steers. *The Professional*  
266 *Animal Scientist* 27:19-28
- 267 Seeliger, D.; de Groot, B.L. Ligand docking and binding site analysis with PyMOL and  
268 Autodock/Vina. *J. Comput. Aided Mol. Des.* 2010, 24, 417–422.
- 269 Jin, Z.; Du, X.; Xu, Y.; Deng, Y.; Liu, M.; Zhao, Y.; Zhang, B.; Li, X.; Zhang, L.; Peng, C.; et  
270 al. Structure of M pro from SARS-CoV-2 and discovery of its inhibitors. *Nature* 2020, 582,  
271 289–293.
- 272 Sayed, A.M.; Alhadrami, H.A.; El-Gendy, A.O.; Shamikh, Y.I.; Belbahri, L.; Hassan, H.M.;  
273 Abdelmohsen, U.R.; Rateb, M.E. Microbial natural products as potential inhibitors of  
274 SARS-CoV-2 main protease (Mpro). *Microorganisms* 2020, 8, 970
- 275 Amaro, R.E.; Baudry, J.; Chodera, J.; Demir, Ö.; McCammon, J.A.; Miao, Y.; Smith, J.C.  
276 Ensemble docking in drug discovery. *Biophys. J.* 2018, 114, 2271–2278.
- 277 Kim, S.; Oshima, H.; Zhang, H.; Kern, N.R.; Re, S.; Lee, J.; Rous, B.; Sugita, Y.; Jiang, W.;  
278 Im, W. CHARMM-GUI free energy calculator for absolute and relative ligand solvation  
279 and binding free energy simulations. *J. Chem. Theory Comput.* 2020, 16, 7207–7218.
- 280 Bowers, K.J.; Chow, D.E.; Xu, H.; Dror, R.O.; Eastwood, M.P.; Gregersen, B.A.; Klepeis, J.L.;  
281 Kolossvary, I.; Moraes, M.A.; Sacerdoti, F.D.; et al. Scalable algorithms for molecular  
282 dynamics simulations on commodity clusters. In *Proceedings of the SC'06: Proceedings of*

the 2006 ACM/IEEE Conference on Supercomputing, Tampa, FL, USA, 11–17 November 2006; *IEEE: New York, NY, USA*, 2006; p. 43.

Phillips, J.C.; Braun, R.; Wang, W.; Gumbart, J.; Tajkhorshid, E.; Villa, E.; Chipot, C.; Skeel, R.D.; Kalé, L.; Schulten, K. Scalable molecular dynamics with NAMD. *J. Comput. Chem.* 2005, 26, 1781–1802.

El-Hawwary, S. S. Abd Almaksoud, H. M. Saber, F. R. Elimam, H. Sayed A.M, M.A. El Raey, Abdelmohsen. U R., 2021. Green Synthesized Zinc Oxide Nanoparticles, Anti-Alzheimer Potential and Metabolic Profiling of *Sabal blackburniana* grown in Egypt supported by molecular modelling, *RSC Adv.* 11,18009.

El-Hawwary, S. S. Saber, F. R, Abd Almaksoud, H. M. Elimam, H. Sayed A.M, Abdelmohsen. U R. Cytotoxic potential of three *Sabal* species grown in Egypt: a metabolomic and docking-based study. *Nat. Prod. Res.*, 19 (2020), pp. 1-6

A. Fahmi., M.A. El Raey., A. Y. Ibrahim., M.A.O. Abdelfattah. A. M. Abdelmageed., M. Sobeh., 2021.A sulfated polyphenols-rich extract from *Sabal yapa* exhibits antitumor ractivities in Ehrlich ascites carcinoma. *Saudi Journal of Biological Sciences*, 28(5), 3117-3125.

D.Roell., A. Baniahmad., 2011.The natural compounds atraric acid and N-butyl benzene-sulfonamide as antagonists of the human androgen receptor and inhibitors of prostate cancer cell growth. *Molecular and Cellular Endocrinology*, 332, 1–2, 1-8.

Ammar, N.M., Hefnawy.M. S. Mohamed, D., Agoor, F., 2013. Antiandrogenic and phytochemical evaluation of solvents and supercritical CO<sub>2</sub> extracts of *Sabal yapa* fruit cultivated in Egypt. *Rivista Italiana delle Sostanze Grasse*; 90 (4), 229-235.

Hänsel, R. ,1991. *Phytopharmaka*. 2nd ed. Springer Berlin-Heidelberg-New York.

Gong Y, Firestone G.L, Bjeldanes L.F. 3,3'-Diindolylmethane is a novel topoisomerase II $\alpha$  catalytic inhibitor that induces S-phase retardation and mitotic delay in human hepatoma HepG2 cells. *Molecular Pharmacology*. 69(4) (2006)1320–1327

Liu, L., Xiong, C., Zhu, Y., Zhou, H., and Ma, S. 2015. The separation and anticancer activity of active monomers from sabal palm seeds. *Beijing Huagong Daxue Xuebao (Ziran Kexueban)/Journal of Beijing University of Chemical Technology (Natural Science Edition)*, 42 (6), pp. 78-83.

Y J Hong, F. A. Tomas-Barberan, A.A., Kader, AE. Mitchell. The Flavonoid Glycosides and Procyanidin Composition of Deglet Noor Dates (*Phoenix dactylifera*) *J. Agric. Food Chem.* 2006, 54, 6, 2405–2411.

---

316 M. Sobeh, S.A. Hassan, M.A. El Raey, W.A. Khalil, M.A. Hassan, M. Wink Polyphenolics from  
 317 *Albizia harveyi* exhibit antioxidant activities and counteract oxidative damage and ultra-  
 318 structural changes of cryopreserved bull semen *Molecules*, 2017 (1993), p. 22

319 P. Mämmeläa, H. Savolainen., L. Lindroos., J. Kangas., T. Vartiainen., 2000. Analysis of oak  
 320 tannins by liquid chromatography-electrospray ionisation mass spectrometry. *Journal of*  
 321 *Chromatography A*, 891, 75-83.

322 Uhlig, S., Negård, M., Heldal, K.K., et al. 2016., Profiling of 3-hydroxy fatty acids as  
 323 environmental markers of endotoxin using liquid chromatography coupled to tandem mass  
 324 spectrometry. *J. Chromatogr. A* 1434, 119-236.

325 Nakano, H., S. Kosemurab, M. Yoshida, T. Suzuki, R. Iwaura, R. Kaji, M. Sakai and K.  
 326 Hirose., 2010a. Oryzamuraic acids B–G, new alkaloids from an *Oryza sativa* mutant with  
 327 yellow endosperm. *Tetrahedron Lett.* 51: 49–53.

328 Farag, M A. Mohsen, M., Heinke, R., Wessjohann, L. A., 2014. Metabolomic fingerprints of 21  
 329 date palm fruit varieties from Egypt using UPLC/PDA/ESI–qTOF-MS and GC–MS  
 330 analyzed by chemometrics. *Food Research International*;64: 218-226.

331 El-Dib R., Kaloga, M., Mahmoud I., Soliman H., Moharram F., and Kolodziej H., 2004.  
 332 Sablaurin A and B, Two 19-nor3,4-seco-lanostane-type Triterpenoids from *Sabal*  
 333 *causiarum* and *Sabal blackburniana*, Respectivly”. *Phytochemistry*, 65: 1153-1157.

334 Gaceb-Terrak, R., Rahmania, F., 2012. Identification and detection of steroidal saponins of  
 335 spirostane type in the date palm *Phoenix dactylifera* L.(Arecaceae). *Acta Botanica Gallica*  
 336 ,159,4,477-483.

337 Yang, X.-H., Cai, Z.-Y., Cai, X., Xu, X.-J., Li, H.-J and Qin, Y, Quality standard of *Sabal* fruit  
 338 extract soft capsules. *Chinese Journal of New Drugs.* 24 (24) (2015)2854-2864.

339 Sen CK, Khanna S, Roy S. Tocotrienols: vitamin E beyond tocopherols. *Life Sci.* 2006 in  
 340 press.

341 Harborne, C. A. Williams, J. Greenham, and P. Moyna. Distribution of charged flavones and  
 342 caffeoylshikimic acid in *Palmae*. *Phytochemistry* .13(1974)1557-1559.

343 Liu, G.-L.; Guo, H.-H.; Sun, Y.-M. Optimization of the extraction of anthocyanins from the fruit  
 344 skin of *Rhodomyrtus tomentosa* (Ait.) Hassk and identification of anthocyanins in the  
 345 extract using high-performance liquid chromatography-electrospray ionization-mass  
 346 spectrometry (HPLC-ESI-MS). *Int. J. Mol. Sci.* 2012, 13, 6292–6302.

347 Idaka, K., Hirai, Y., Shoji, J., 1991. Studies on the constituents of *Palmae* plants.

348 V. Steroid saponins and flavonoids of leaves of *Phoenix rupicola*, T. Anderson, P.  
 349 *loureirii* Kunth, P. *reclinata* NJ Jacquin, and *Areca strum remanzoffianum* Beccari.

---

---

350      *Chem. Pharm. Bull.* 39, 1455–1461.

351 J. Pollier. A. Goossens., 2012, Oleanolic acid. *Phytochemistry*, 77, 10-15.

352 R. A Hiipakka., H-Z. Zhang, W. D Qing Dai, S. Liao., 2002. Structure-activity relationships for  
 353      inhibition of human 5 $\alpha$ -reductases by polyphenols. *Biochem Pharmacol*,  
 354      15;63(6):1165-76.

355 S. Ouafi, R. Gaceb-Terrak, N. Bounaga, P. Lebreton, *Compt. rend. Acad. Sci. Paris*, 1988,  
 356      III306: 399–404

357 Tomas Lorente, F. and Ferreres, F. (1988). Sulfatos de flavonoides en frutos ' de phoenix  
 358      dactilifera (Flavonoid sulphates from *Phoenix dactylifera* fruits). *Revista de Agroqu'ímica y*  
 359      *Tecnolog'ia de Alimentos*. 28(4): 581–585.

360 Goupy, P., Hugues, M., Boivin, P., M. Josèphe, M., 1999. Antioxidant composition and  
 361      activity of barley (*Hordeum vulgare*) and malt extracts and of isolated phenolic  
 362      compounds. *Amiot, JSFA* ;79, 12,1625-1634.

363 W.Y. Jin., B. Min, J. Pill Lee, P T. Thuong, H. Lee, K. Song, Y. H. Seong, K. Hwan Bae.,2007.  
 364      Isolation of constituents and anti-complement activity from *Acer okamotoanum*. *Arch*  
 365      *Pharm Res.* 30(2):172-176.

366 Hifnawy, M.S., Mahrous, A.M., Ashour, R.M., 2016. Phytochemical investigation of  
 367      *Phoenix canariensis* Hort. ex Chabaud leaves and pollen grains. *J. Appl. Pharm.*  
 368      *Sci.* 6, 103–109.

369

370

371

372

373

374

375

376

377

378

379

380

---
